# Supplementary material
Source: PubMed Central journal article supplement (PMC3012550)

## **Mice and antibodies**

Wild-type C57Bl/6J (C57; CD45.2<sup>+</sup>), B6.SJL-PtcaPep3b/BoyJ (BoyJ; CD45.1<sup>+</sup>) mice were purchased from the Jackson Laboratory (Bar Harbor, ME) and (CD45.1×CD45.2) F<sub>1</sub> progeny of C57 and BoyJ mice obtained from a breeding colony at the Indiana University School of Medicine (Indianapolis, IN). Prior to this study, X-CGD mice, which carry a null allele for *gp91<sup>phox</sup>*<sup>1</sup>, were backcrossed into C57 for more than 16 generations. X-CGD mice were crossed to BoyJ mice to generate CD45.1<sup>+</sup> X-CGD mice, which were bred with C57 X-CGD mice to produce (CD45.1<sup>+</sup> CD45.2<sup>+</sup>) F<sub>1</sub> progeny. Mice were housed under pathogen-free conditions and fed autoclaved food and acidified water. Animal protocols were approved by the Institutional Animal Care and Use Committee of the Indiana University School of Medicine.

## **Antibodies and other reagents.**

Antibodies against CD3-phycoerythrin (PE), Ter119-PE, B220-PE, Gr-1-PE, Mac-1-PE, sca-1-PECy7, CD34-fluorescein isothiocyanate (FITC), CD45.1-PE or allophycocyanin (APC) and CD45.2-FITC were purchased from BD Bioscience (San Jose, CA). Anti-CD150-PerCP-Cy5.5 and anti-CD16/32-APC-Cy7 were purchased from Biolegend (San Diego, CA). Purified anti-CD135, anti-rat-IgG-FITC and anti-IL7Rα-eFluor450 were purchased from eBioscience (San Diego, CA). Anti-KIT (3C11) conjugated to biotin and streptavidin conjugated to APC were purchased from Invitrogen (Carlsbad, CA). Dihydrorhodamine 123 (DHR 123) was obtained from Molecular Probes Inc (Eugene, OR).

## **Preparation of ACK2 and treatment of recipient mice**

The ACK2 hybridoma cell line was a generous gift from S. Nishikawa (Kyoto University, Kyoto, Japan)<sup>2</sup>. Hybridoma cells were adapted to serum-free media and a high titer-producing clone was isolated by limiting dilution. Purified ACK2 antibody was prepared at the University of

Nebraska Medical Center Monoclonal Antibody Facility. Based on dosing used by Ogawa et al<sup>2</sup> and our preliminary studies showing a seven-fold reduction in marrow CFUS-12 content at seven days following intraperitoneal administration of 2 mg ACK2, 2 mg of ACK2 in 0.5 cc saline or 0.5 cc saline was administered by intraperitoneal injection into 8- to 12-week-old mice. On Day 4 after ACK2 administration, some of the mice were irradiated with 300 cGy. On Days 7, 10 and 14, mice were sacrificed and marrow harvested from femurs. Because of the marked reduction in marrow cellularity in mice treated with the combination of ACK2 and 300 cGy, mice in this cohort at Day 14 after ACK2 administration were transplanted with  $2 \times 10^5$  CD45.2+ donor splenocytes on day 7 after ACK2. After erythrocyte lysis, the remaining cells were stained with antibodies prior to analysis by flow cytometry on a BD FACS-Aria. HSC frequency was determined by gating on  $\text{lin}^- \text{Sca-1}^+ \text{KIT}^+ \text{CD135}^- \text{CD150}^+$  cells and common myeloid progenitor cells were gated as  $\text{lin}^- \text{Sca-1}^- \text{KIT}^+ \text{CD34}^{\text{low}} \text{FcγR}^{\text{low}}$ . For the Day14 ACK2 and 300 cGy treated cohort, host HSCs and HPCs were determined with CD45.1 and CD45.2 staining in addition to regular HSC and HPC markers, showing that more than 95% of residual HSC and HPC in the marrow were host-derived. In some mice treated with ACK2, a colony forming unit (CFU) assay was also done to enumerate bone marrow granulocyte/macrophage progenitor cells on day 7.  $2 \times 10^4$  bone marrow cells were plated in 35 mm culture dish with methylcellulose-based semisolid media (StemCell Technologies Inc., Vancouver, Canada) with 50U/ml mIL-3 (Peprotech, Rocky Hill, NJ) and cultured for 14 days at 37° C. Hematopoietic colonies were identified and counted by inverted microscope. Peripheral blood (30 µl) was collected from tail vein into BD Microtainer tubes with EDTA and analyzed with a Hemavet Mascot hematology analyzer from Drew Scientific Group (Dallas, TX).

To estimate the concentration of ACK2 after administration, sera and purified ACK2 were diluted serially and incubated with primary mouse bone marrow-derived mast cells, which

express high levels of KIT. Goat-anti-rat IgG APC was added to each serial dilution; then the serum concentration of ACK2 was estimated using a relative standard curve derived from the mean fluorescence intensity of mast cell staining by the antibody. The correlation between mean channel fluorescence (MCF) and antibody concentration was analyzed by linear regression analysis (Microsoft Excel) similar to a previously described approach.<sup>3</sup>

For transplantation, recipient mice received ACK2 injections or saline on Day 1. On Day 4, some mice received 300 cGy (<sup>137</sup>cesium source). On Day 7, recipients were transplanted with unfractionated fresh BM or BM cultured *ex vivo* for lentiviral-mediated gene transfer, as below.

### **Long-Term Repopulating Activity of Conditioned Marrow**

Marrow HSC function in C57 mice treated with ACK2, LD-IR, or ACK2 + LD- IR was assessed using a competitive repopulation assay adapted from Harrison <sup>4</sup>. Bone marrow was harvested from femurs of 4–12 mice in each cohort and pooled; a mixture containing 1-1.33 femur equivalent of BM pooled from a cohort of treated mice (“test cells”) and fresh untreated BoyJ marrow cells (“competitor cells”) was transplanted into each of four lethally irradiated C57 recipients. In the cohorts treated with either ACK2 or LD-IR alone, the number of competitor cells was  $1 \times 10^6$  while for the ACK2 + LD-IR cohort, either  $0.2 \times 10^6$  or  $0.5 \times 10^6$  competitors were used. For the untreated control group, a mixture containing  $1 \times 10^6$  test (control) cells and  $1 \times 10^6$  competitor cells was transplanted into each of 4 recipients. Test (CD45.2) and competitor (CD45.1) chimerism was assessed by flow cytometry 4–5 months after transplantation. The relative long-term repopulating ability of test cells compared to that of CD45.1 BoyJ competitor bone marrow cells was calculated for each mouse, and the mean was determined, as previously described <sup>4-6</sup>. Briefly, first, repopulating units (RU) were calculated as follows:  $RU = \% \text{ test cell donor chimerism} \times C / (1 - \% \text{ test cell donor chimerism})$ , where C = competitor cell number/ $10^5$ . How well the test cells repopulated the recipient marrow per  $10^5$  test cells

used (referred to as long term repopulating ability) was calculated as equal to RU/actual number of test cells used/ $10^5$  competitor cells.

### **Engraftment analysis**

Transplantation of fresh unfractionated whole bone marrow into 8- to 12-week-old congenic recipients conditioned as above was performed as described. Donor engraftment was assessed at various time points post-transplantation as follows. Peripheral blood (PB) leukocytes were stained with anti-CD45.2-fluorescein isothiocyanate (FITC) or CD45.1-PE antibodies (BD Pharmingen; San Diego, CA), and the fluorescence was measured by flow cytometry using a BD FACSCalibur. The data collected was analyzed using Cellquest software (BD Biosciences; San Jose, CA); then donor chimerism was determined by the percentage of CD45.2<sup>+</sup> cells in PB leukocytes. T cells, B cells and granulocytes were also stained with CD3, CD19 and Gr1 to detect donor chimerism in different lineages.

### **Lentiviral Transduction of Bone Marrow**

Lineage-negative cells were separated from the bone marrow of congenic CD45.2<sup>+</sup> X-CGD mice with MACS beads (Miltenyi Biotec, Bergisch Gladbach, Germany) and transduced with VSVG-pseudotyped CL20-gp91-OPT<sup>7</sup> lentiviral vector<sup>7</sup>, which is similar to CL20i4-EF1alpha-hgamma(c)OPT<sup>8</sup> but contains a codon-optimized gp91phox cDNA. The transduction was performed at an MOI of 10:1 overnight *in vitro* similar to as previously described<sup>9</sup>. Briefly, lin<sup>-</sup> bone marrow cells prepared from 6–12-week-old male X-CGD mice were plated in IMDM containing 20% fetal calf serum, 200 U/ml recombinant interleukin-6 and 100 ng/ml recombinant murine stem cell factor (Peprotech, Rocky Hill, NJ) with 8 µg/ml polybrene and concentrated lentiviral vector at MOI of 10. After overnight transduction, the gene-modified cells were counted and  $5 \times 10^5$  cells injected on Day 7 into the tail vein of each 8- to 10-week-old F1 (CD45.1<sup>+</sup>CD45.2<sup>+</sup>) X-CGD recipient, who were conditioned with either 300cGy or ACK2 +

300cGy according to the schedule in Figure 1A. Donor cell chimerism post-transplant was monitored by staining PB leukocytes for CD45.1 and CD45.2 expression as above. Expression of vector-transferred gp91<sup>phox</sup> following transplantation was determined by monitoring NADPH oxidase activity in PB neutrophils of X-CGD recipients by flow cytometry using dihydrorhodamine 123 (DHR 123) fluorescence. <sup>6</sup>

## REFERENCES

1. Pollock JD, Williams DA, Gifford MA, et al. Mouse model of X-linked chronic granulomatous disease, an inherited defect in phagocyte superoxide production. *Nat Genet.* 1995;9:202-209.
2. Ogawa M, Matsuzaki Y, Nishikawa S, et al. Expression and function of c-kit in hemopoietic progenitor cells. *J Exp Med.* 1991;174:63-71.
3. Piechocki MP, Lonardo F, Ensley JF, Nguyen T, Kim H, Yoo GH. Anticancer activity of docetaxel in murine salivary gland carcinoma. *Clin Cancer Res.* 2002;8:870-877.
4. Harrison DE, Jordan CT, Zhong RK, Astle CM. Primitive hemopoietic cells: direct assay of most productive populations by competitive repopulation with simple binomial, correlation and covariance calculations. *Exp Hematol.* 1993; 21: 206-219.
5. Goebel WS, Yoder MC, Pech NK, Dinanuer MC. Donor chimerism and stem cell function in a murine congenic transplantation model after low-dose radiation conditioning: effects of a retroviral-mediated gene transfer protocol and implications for gene therapy. *Exp Hematol.* 2002;30:1324-1332.
6. Barese C, Pech N, Dirscherl S, et al. Granulocyte colony-stimulating factor prior to nonmyeloablative irradiation decreases murine host hematopoietic stem cell function and increases engraftment of donor marrow cells. *Stem Cells.* 2007;25:1578-1585.
7. Choi U, Throm RE, Kang ME, et al. Development of a pCL20c-backbone based HIV Lentivirus Vector That Achieves Efficient Functional Correction of Neutrophils Arising from Transduced CD34+ Hematopoietic Progenitor Cells of Patients with X-linked Chronic Granulomatous Disease. *Molecular Therapy.* 2010;18:S137.
8. Zhou S, Mody D, Deravin SS, et al. A self-inactivating lentiviral vector for SCID-X1 gene therapy that does not activate LMO2 expression in human T cells. *Blood.* 2010; 115: 900-908.
9. Kahl CA, Pollok K, Haneline LS, Cornetta K. Lentiviral vectors pseudotyped with glycoproteins from Ross River and vesicular stomatitis viruses: variable transduction related to cell type and culture conditions. *Mol Ther.* 2005;11:470-482.

**Table S1. Effect of ACK2 and/or LD-IR treatment on peripheral blood counts**

| <b>Blood</b>      |                |                            |                          |                            |
|-------------------|----------------|----------------------------|--------------------------|----------------------------|
| <b>Parameters</b> | <b>Control</b> | <b>ACK2</b>                | <b>IR</b>                | <b>ACK2+IR</b>             |
| RBCs (m/μl)       | 11.6 ± 0.6     | 9.2 ± 0.1 <sup>**</sup>    | 9.1 ± 0.4 <sup>**</sup>  | 7.2 ± 0.8 <sup>**</sup>    |
| Hemoglobin (g/dl) | 17.0 ± 0.5     | 13.1 ± 0.4 <sup>**</sup>   | 13.2 ± 0.6 <sup>**</sup> | 9.8 ± 1.2 <sup>**</sup>    |
| Hematocrit (%)    | 48.5 ± 2.3     | 39.0 ± 0.9 <sup>**</sup>   | 39.2 ± 1.7 <sup>**</sup> | 29.2 ± 3.5 <sup>**</sup>   |
| WBC (k/μl)        | 22.1 ± 3.6     | 16.9 ± 1.4 <sup>*</sup>    | 8.8 ± 1.3 <sup>**</sup>  | 1.9 ± 0.9 <sup>**</sup>    |
| NE (k/μl)         | 5.6 ± 0.5      | 1.8 ± 0.2 <sup>**</sup>    | 5.5 ± 0.8                | 0.5 ± 0.2 <sup>**</sup>    |
| LY (k/μl)         | 15.0 ± 2.6     | 14.0 ± 1.3                 | 2.4 ± 0.4 <sup>**</sup>  | 1.2 ± 0.5 <sup>**</sup>    |
| MO (k/μl)         | 0.8 ± 0.1      | 0.6 ± 0.1 <sup>*</sup>     | 0.3 ± 0.1 <sup>**</sup>  | 0.1 ± 0.1 <sup>**</sup>    |
| PLT (k/μl)        | 1307.0 ± 60.1  | 526.0 ± 70.7 <sup>**</sup> | 1313.3 ± 235.3           | 419.7 ± 66.1 <sup>**</sup> |

Peripheral blood was collected from control mice and mice that had been treated with ACK2 and/or IR, with administration of ACK2 10 days prior and LD-IR 7 days prior (n = 3 mice in each group). Several hematological parameters were assessed. \*\*: P<0.01 and \*: P<0.05 compared with control group.

**Figure S1. ACK2 clearance post administration.** (A) After administration of 2 mg ACK2, sera were collected on Days 7, 10 and 14, and incubated with murine marrow-derived mast cells expressing high levels of KIT. ACK2 was still detected in sera on Day 7 and but not on Days 10 and 14 after administration. (B) Flow cytometry was used to determine the relative staining intensity of marrow-derived mast cells, stained using serum obtained at Day 7 following ACK2 or with known concentrations of ACK2.

**Figure S2. Multilineage donor chimerism in peripheral blood and in marrow HSC following transplantation.** (A) Multilineage analysis of donor CD45.2 cells in representative transplanted mice. Recipient mice received ACK2 +/- LD-IR, followed by transplantation of  $1 \times 10^6$  or  $20 \times 10^6$  marrow cells from donor mice as described in Figure 2B. The percentage of donor CD45.2 lymphoid (CD3 and CD19) and myeloid (Gr-1) cells in peripheral blood is shown based on the FACS profile at 12 weeks post-transplantation (n = 4 in each group). (B) Chimerism in peripheral blood leukocytes and marrow HSC ( $\text{KIT}^+ \text{lineage}^- \text{Sca-1}^+ \text{CD135}^- \text{CD150}^+$ ) of primary recipients at 32 weeks post-transplantation (shown also Fig. 2A). Gray bar shows the 300cGy cohort and dark solid bar shows ACK2 + LD-IR cohort (n = 4 in each cohort). \*\* indicates  $P < 0.01$ .

Figure S1

A

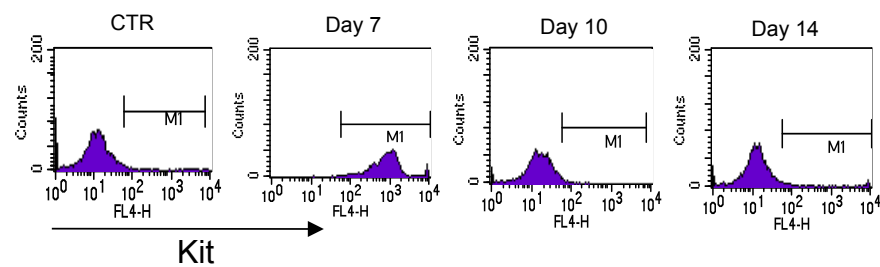

B

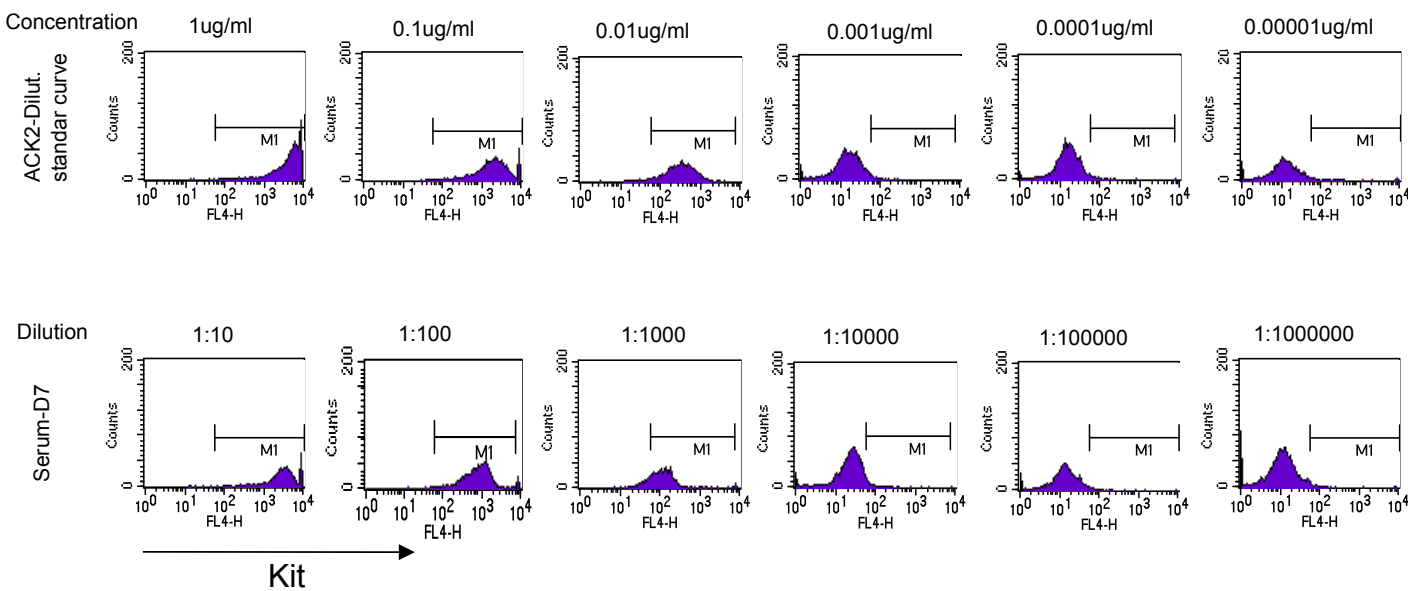

Fig. S2

A

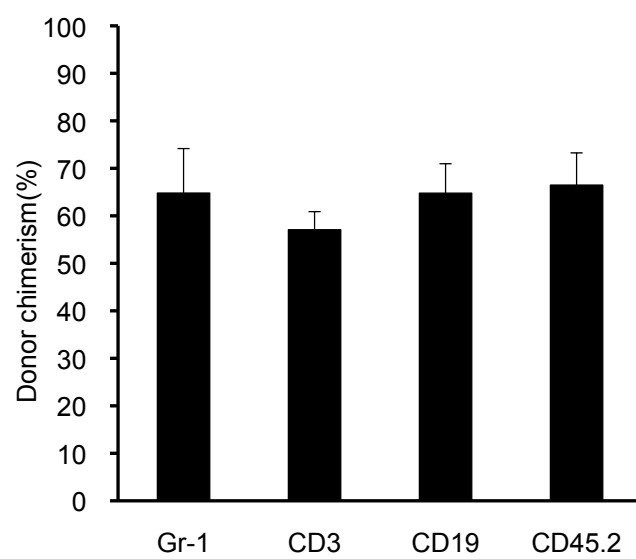

B

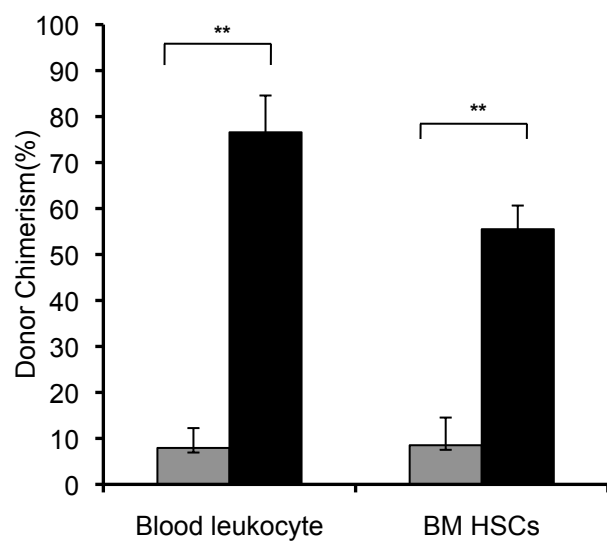

Supplement: blood-2010-07-295949_1.pdf [file blood-2010-07-295949_1.pdf]
